# Supplementary material for: High miR-100 expression is associated with aggressive features and modulates TORC1 complex activation in lung carcinoids
Source: PubMed Central journal article supplement (PMC6007959; doi:10.18632/oncotarget.25541), 2018-06-08
Supplement: oncotarget-09-27535-s001.pdf [file oncotarget-09-27535-s001.pdf]

## High miR-100 expression is associated with aggressive features and modulates TORC1 complex activation in lung carcinoids

### SUPPLEMENTARY MATERIALS

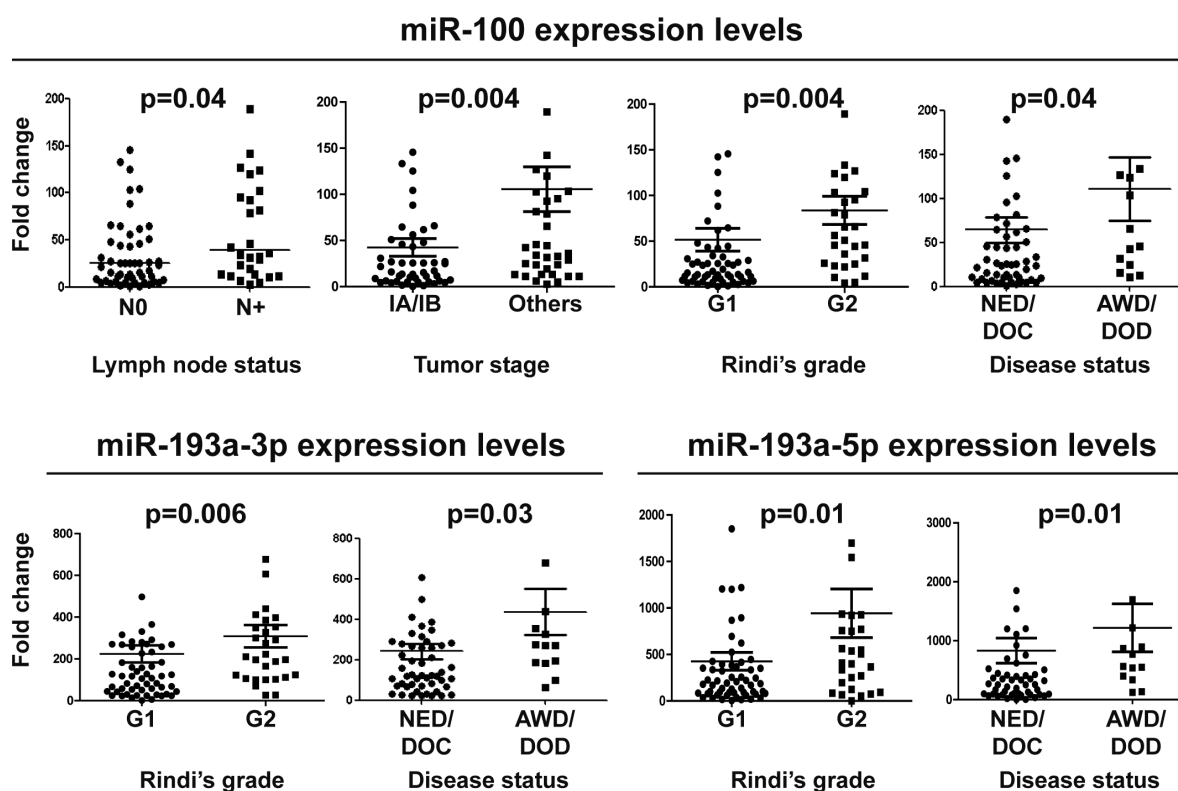

Supplementary Figure 1: Correlation of miR-100, miR-193a-3p and miR-193a-5p expression levels with clinical and pathological characteristics in lung carcinoids.

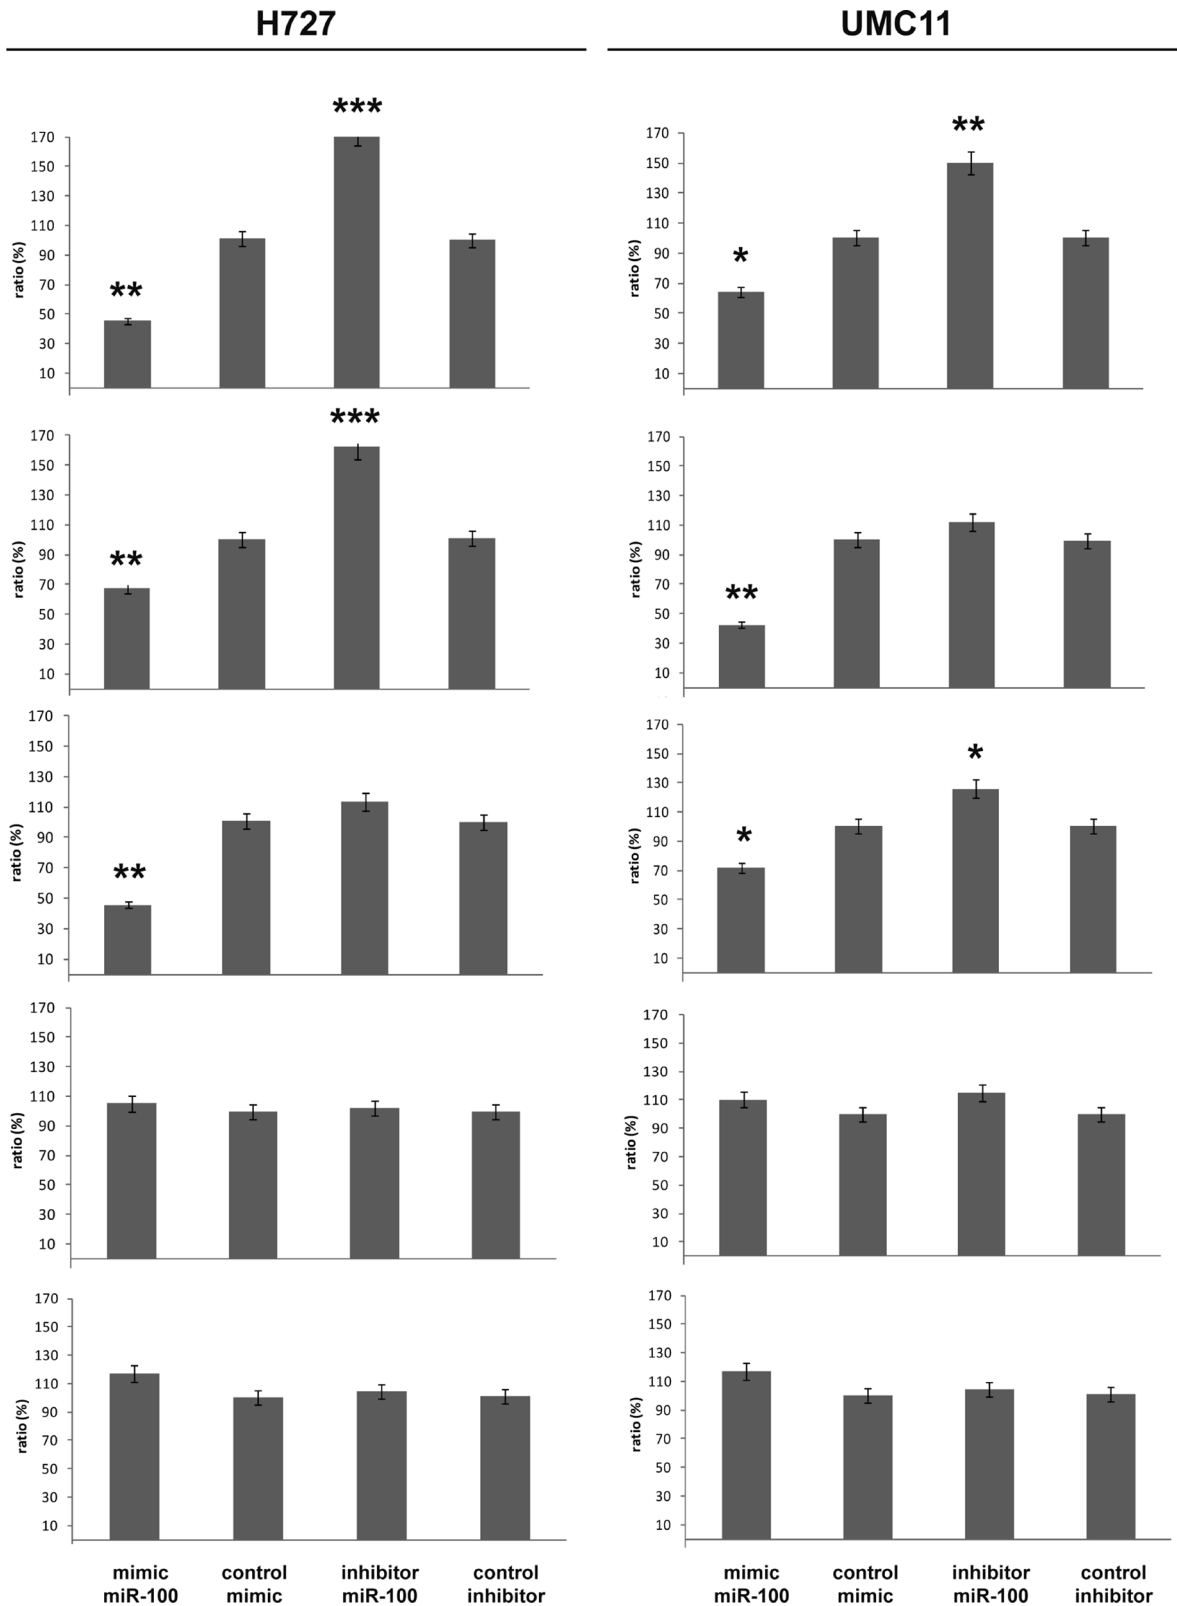

Supplementary Figure 2: Quantification of Western blot bands illustrated in Figure 2G and 2H, by means of ImageJ software. Data was represented as mean  $\pm$  SEM. \* $p < 0.05$ , \*\* $p < 0.01$ , \*\*\* $p < 0.001$ .

**Supplementary Table 1: Description of case series of 142 lung neuroendocrine neoplasms**

|                                   | <b>TC<br/>#50</b> | <b>AC<br/>#42</b> | <b>LCNEC<br/>#29</b> | <b>SCC<br/>#21</b> |
|-----------------------------------|-------------------|-------------------|----------------------|--------------------|
| <b>Sex (M/F)</b>                  | 21/29             | 23/19             | 26/3                 | 16/5               |
| <b>Age (mean)</b>                 | 55                | 58                | 65                   | 66                 |
| <b>Tumor stage pT1/pT2/pT3-4</b>  | 35/11/4           | 20/16/5           | 6/16/3               | 3/6/0              |
| <b>Size (median)</b>              | 2.8               | 4.07              | 3.5                  | 3.2                |
| <b>Nodal status N0/N+</b>         | 35/15             | 22/20             | 18/11                | 18/3               |
| <b>Proliferation index (mean)</b> | 4.5               | 9.5               | 66.1                 | 87.6               |

**Supplementary Table 2: List of miRNA assays and genes used in real-time PCR and mimic/inhibitor miRNA used for cell transfection**

| <b>miRNA/gene</b>                 | <b>Assays code</b> |
|-----------------------------------|--------------------|
| <b>hsa-miR99a-5p</b>              | 000435             |
| <b>hsa-miR99b-5p</b>              | 000436             |
| <b>hsa-miR100a-5p</b>             | 000437             |
| <b>has-miR-155a-5p</b>            | 002623             |
| <b>has-miR-193a-3p</b>            | 002250             |
| <b>has-miR-193a-5p</b>            | 002281             |
| <b>has-miR-199-3p</b>             | 002304             |
| <b>RNU6B</b>                      | 001093             |
| <b>mTOR</b>                       | Hs-00234508_m1     |
| <b>ACTB</b>                       | Hs-01060665_g1     |
| <b>Mimic/inhibitor</b>            | <b>Assays code</b> |
| <b>hsa-miR100a-5p mimic</b>       | MC10188            |
| <b>hsa-miR100a-5p inhibitor</b>   | MH10188            |
| <b>has-miR-193a-3p mimic</b>      | MC11123            |
| <b>has-miR-193a-3p inhibitor</b>  | MH11123            |
| <b>has-miR-193a-5p mimic</b>      | MC11786            |
| <b>has-miR-193a-5p inhibitor</b>  | MH11786            |
| <b>Mimic negative control</b>     | 4464058            |
| <b>Inhibitor negative control</b> | 4464076            |
